# Supplementary material
Source: publisher figshare collection journal article supplement (https://frontiersin.figshare.com/ndownloader/files/16618322)
Supplement: Supplementary file 1 [file 16618322]

	Lat	Long	Av	Aspect	Bcurm	CCwarm	Nutrflux	Rugmean	Schlmean	BPI	Ship	Shoredev	Slopemean	Fishing	Sturmean	Depth	ProxPop
1	2349868.906	629453.9783	0	75.37232153	0.004924479	8.380999565	0	1.084820479	0.079588099	32.4375	185.5264898	0	14.61814738	0.058696587	0.001671313	46.60342345	NA
2	2350118.906	628953.9783	0	168.0301053	0.004923786	8.304605294	0	1.012703715	0.080161891	95.53922049	188.8962089	0	4.810144506	0.059232078	0.001669868	38.20737053	81780.63288
3	2350118.906	629203.9783	0	178.7294868	0.004725575	8.304605294	0	1.031527702	0.079648808	90.43185785	186.4336477	0	7.959266885	0.059042566	0.001671198	40.70624924	80949.96384
4	2350118.906	629453.9783	0	112.5669301	0.004638748	8.304605294	0	1.040125007	0.079588099	49.37849283	188.1494338	0	9.503449823	0.058849845	0.001671313	46.60342345	80650.6191
5	2350618.906	598953.9783	0	238.7001114	0.009268334	4.461999893	0	1.012805184	0.08838843	98.0197182	276.7676768	0	5.086050956	0.072	0.001765679	53.23640708	NA
6	2350618.906	599203.9783	0	180.8518337	0.009614957	4.461999893	0	1.004834294	0.088362919	103.8125	274.3239152	0	3.732091805	0.072	0.001764847	53.2204353	NA
7	2350868.906	599203.9783	0	168.656025	0.00945945	4.461999893	0	1.000494922	0.088871483	103.9669771	266.8554499	0	1.288589603	0.072	0.001767662	45.07332581	NA
8	2350868.906	623453.9783	1	117.940682	0.01073235	3.63499999	2685.576978	0.716003254	0.083497986	89.8074725	155.7281145	0.032623685	1.050279202	0.517620027	0.001613252	3.440000057	95153.12306
9	2351118.906	597953.9783	0	195.5938237	0.006590532	4.293000221	0	1.013973195	0.090842651	59.29811	265.4291025	0	5.120801569	0.072	0.001796995	76.38707037	NA
10	2351118.906	598203.9783	0	187.2224412	0.007379744	4.293000221	0	1.01330135	0.090607676	65.90992018	251.4099483	0	3.705580042	0.072	0.001789517	66.10565994	NA
11	2351118.906	598453.9783	0	187.7685173	0.007725568	4.293000221	0	1.013013957	0.090579924	69.5952583	239.3471834	0	3.125116648	0.072	0.001788635	65.41799905	NA
12	2351118.906	625703.9783	1	154.6748286	0.007476846	6.894999981	4208.512682	0.785021354	0.083199127	26.04502507	206.5925646	0.022224743	1.474994554	0.168609351	0.001645719	5.359814735	93273.33568
13	2351368.906	595703.9783	0	244.3915513	0.001749589	4.293000221	0	1.006346178	0.091005997	123.1129903	254.7352795	0	4.237507922	0.069250658	0.001811688	60.97704474	NA
14	2351368.906	596453.9783	0	181.1177104	0.003326751	4.293000221	0	1.000999634	0.091978561	100.0562917	285.284456	0	2.140703488	0.070140287	0.00181296	54.81622053	NA
15	2351368.906	596703.9783	0	180.6509057	0.003672304	4.293000221	0	1.000940084	0.092029871	87.50836158	277.191809	0	2.034436703	0.070687391	0.001813027	54.83576794	NA
16	2351368.906	596953.9783	0	182.662551	0.004115337	4.293000221	0	1.000848801	0.092515997	86.21269504	267.5901076	0	1.908990847	0.07096047	0.001813663	54.8486334	NA
17	2351368.906	597203.9783	0	182.7212605	0.004903917	4.293000221	0	1.000561481	0.092950769	74.55207338	265.0924731	0	1.528841291	0.071233176	0.001814232	53.55383813	NA
18	2351368.906	597453.9783	0	185.0059799	0.005249465	4.293000221	0	1.000392914	0.092946782	65.96882939	264.5248769	0	1.308651447	0.071505465	0.001813643	53.2242501	NA
19	2351368.906	597703.9783	0	191.2434976	0.005692487	4.293000221	0	1.000283547	0.092882999	65.20560907	261.9499146	0	1.096834724	0.072048664	0.001807757	50.05442963	NA
20	2351368.906	597953.9783	0	196.5796253	0.006481046	4.293000221	0	1.000121695	0.092598816	58.75125209	264.8412264	0	0.649216826	0.0723195	0.001799259	46.40349566	NA
21	2351368.906	625703.9783	1	154.6134062	0.006928459	6.894999981	4276.67041	0.672227859	0.083279665	24.10661464	179.104245	0.0240535	1.408248425	0.723338723	0.001644661	2.602443648	93966.03736
22	2351368.906	625953.9783	1	159.5388906	0.006646395	6.894999981	4039.447794	0.760305525	0.083310438	17.13851571	205.4125004	0.023141589	1.511974248	0.723294854	0.001647849	4.626205113	93714.51136
23	2351618.906	595703.9783	0	249.2538528	0.001708306	4.293000221	0	1.004590644	0.091537312	123.5547757	214.0663642	0	3.186808313	0.069381431	0.001811687	49.88124847	NA
24	2351618.906	595953.9783	1	195.7587789	0.002053746	4.293000221	0	1.001627531	0.091588814	115.8125	223.5577807	0	2.26602346	0.069677658	0.001811754	49.26379859	NA
25	2351618.906	621953.9783	1	262.8868331	0.012234901	3.63499999	1303.223367	0.742195845	0.08442649	84.05695939	247.9337938	0.033520627	0.190645322	0.173245013	0.001551318	0.908394587	99273.38378
26	2351618.906	622203.9783	1	225.0187341	0.011942	3.63499999	1362.631481	0.523438	0.084389121	92.59999847	100.3982276	0.039281852	0.109	0.727470219	0.001552825	0.850513176	99454.48376
27	2351618.906	625953.9783	1	155.624803	0.006580609	6.895	0	0.723149397	0.083381608	16.72057461	150.5452179	0.024429489	1.412438492	0.72	0.001647308	3	94257.40845
28	2351618.906	626203.9783	1	127.674691	0.006309297	6.894999981	3325.843262	0.762866663	0.083363243	13.0666666	182.9929501	0.02409972	1.415706619	0.723055482	0.001647873	3.368710912	94332.32636
29	2351868.906	621953.9783	1	259.820893	0.012150958	3.63499999	1516.02644	0.739037307	0.084590398	78.92857361	216.0022651	0.036245055	0.178493324	0	0.001549562	0.807142854	100923.3036
30	2351868.906	622203.9783	1	184.9808421	0.012235	3.63499999	1599.067425	0.742196	0.084590398	78.9	90.08391393	0.040835959	0.1906	0	0.001549562	0.807142854	101349.5217
31	2351868.906	626203.9783	1	122.0669574	0.006010027	6.895	0	0.593837559	0.083382571	13.83561952	85.06140455	0	0.962902725	0.72	0.001647831	2.985451351	95140.51239
32	2351868.906	626453.9783	1	136.6866947	0.005649632	6.894999981	2102.68457	0.64617111	0.0833675	13.38290927	196.3413552	0.022738622	1.015096657	0.722780704	0.00165285	3.351219364	95398.20831
33	2351868.906	626703.9783	1	156.3910894	0.005073868	6.894999981	775.5708438	0.833379618	0.083170596	9.54329312	234.3199715	0.02267613	0.849138948	0.168039292	0.001657789	7.49573265	95358.23721
34	2352118.906	621953.9783	1	251.7122319	0.011943305	3.63499999	1463.96863	0.740693585	0.085006981	62.72680338	214.1891207	0.038319823	0.135182447	0	0.001547373	0.673065691	103328.1448
35	2352118.906	622203.9783	1	176.4523976	0.012027	3.63499999	1594.292051	0.74338	0.084994454	58.38	94.38678914	0.042416318	0.1606	0	0.001547438	0.677097382	103562.5574
36	2352118.906	626703.9783	1	164.0173218	0.004755182	6.894999981	548.0588989	0.669059287	0.083449049	11.34217507	226.5280838	0	0.818368526	0.722298443	0.001658113	2.435642199	96551.8465
37	2352118.906	633703.9783	1	245.1645168	0.000955686	6.666999817	141.8034263	0.72787879	0.076797089	41.84268356	52.96352432	0.008999315	0.117987152	0.507681012	0.001658061	0.884935213	66746.85412
38	2352368.906	621953.9783	1	246.0251144	0.011819621	3.63499999	1237.023231	0.750001788	0.085630355	47.69754205	241.4260099	0.03910109	0.097741589	0	0.001545877	0.523054502	104731.7249
39	2352368.906	622203.9783	1	193.6340184	0.01182	3.63499999	1276.023688	0.75	0.085616999	44.83	108.8382113	0.043089122	0.0977	0	0.001545894	0.525830863	104428.0938
40	2352368.906	626703.9783	1	163.8981815	0.004683944	6.895	0	0.618357898	0.08353769	11.76063386	104.8101393	0	0.637904392	0.72	0.00165825	0.75	97509.00738
41	2352368.906	626953.9783	1	163.2347878	0.004393077	6.894999981	516.9353027	0.722836583	0.083532987	9.800000191	203.5508347	0	0.866413025	0.721818864	0.001658952	0.796116467	97782.86991
42	2352368.906	627203.9783	1	148.9512217	0.004088579	6.894999981	500.0154482	0.792147721	0.083458682	9.536153379	199.7212166	0.02366985	0.795571093	0.721719146	0.001665496	1.34526524	97727.55074
43	2352368.906	627453.9783	1	155.1606534	0.003546513	6.894999981	319.3464934	0.919120244	0.083128168	7.33419895	175.75957	0.021587967	0.626328437	0.721546173	0.00167108	2.799067993	97696.85125
44	2352368.906	633703.9783	1	242.0894163	0.00088656	6.666999817	371.709133	0.757502929	0.076871496	39.48312048	83.92816418	0.008403303	0.103107333	0.507296801	0.001658069	0.759346106	67763.58884
45	2352368.906	633953.9783	1	264.5921773	0.000824682	6.666999817	354.2607992	0.591401629	0.076935805	46	36.148489	0.009089544	0.052266985	0.714891791	0.001650689	0.150000006	67076.6875
46	2352618.906	627203.9783	1	118.837663	0.003757492	6.894999981	477.7478027	0.492233036	0.083559889	10.7340354	140.5309621	0	0.272861643	0.721564233	0.001665862	0.372631001	98891.69566
47	2352618.906	627453.9783	1	119.854693	0.003126226	6.894999981	316.06336	0.692326857	0.083227214	10.18677795	150.4595258	0.02409972	0.556600392	0.721464336	0.001671468	1.322698444	98735.02834
48	2352618.906	627953.9783	1	157.2495005	0.002263746	6.894999981	387.1861843	0.916738501	0.082857046	8.416225659	144.2865923	0.022475126	0.745357222	0.166555554	0.00167676	2.491135379	98601.52728
49	2352618.906	633953.9783	1	264.488271	0.000587716	6.666999817	694.716305	0.621034681	0.076995964	35.39718503	31.85400206	0.009070662	0.034524687	0.714715958	0.001650707	0.176373445	NA
50	2352868.906	627703.9783	1	166.4055628	0.002152988	6.894999981	438.2773743	0.692859975	0.083169545	10.75461052	107.5594352	0.024429489	0.239288883	0.720987022	0.001677331	1.060241747	99327.40688
51	2352868.906	628203.9783	1	160.4708885	0.001580805	6.894999981	418.6128845	0.786528517	0.08272249	10.34048648	139.7200668	0.021671398	0.222511564	0.720602512	0.001682628	1.644229951	99199.06774
52	2352868.906	633953.9783	1	267.9624974	0.000446471	6.666999817	930.995155	0.500000298	0.077051772	22.02284147	25.58769801	0.009131037	0.032681592	0.714539886	0.001650734	0.196424161	NA
53	2353118.906	628203.9783	1	166.0393881	0.001580805	6.894999981	418.6128845	0.786528517	0.08283936	10.69183962	94.7307403	0.024146871	0.222511564	0.72048825	0.001683026	0.753298344	NA
54	2353118.906	628703.9783	1	172.7311492	0.001018496	6.894999981	330.8566116	0.671877027	0.082406072	10.75	40.43677797	0.024306714	0.201286197	0.719930708	0.001687263	0.777951656	99802.48408
55	2353118.906	629203.9783	1	168.4919461	0.000815619	6.894999981	352.6873779	0.829461011	0.081846658	9.461947332	65.28421258	0.024246001	0.867929293	0.719564021	0.001694044	0.778206253	99099.6668
56	2353118.906	629453.9783	1	157.1073561	0.000799848	6.894999981	352.6873779	0.925777355	0.081795512	6.875	112.545016	0.022836125	1.005968639	0.719123065	0.001694249	0.925038763	98506.51664
57	2353118.906	629953.9783	1	174.1707352	0.000743996	6.666999817	213.0519314	0.933648141	0.080834116	6.207592474	107.3161107	0.020576914	0.936039251	0.164430365	0.001697	2.64915195	95483.02382
58	2353118.906	633953.9783	1	266.0906327	0.000273032	6.666999817	1057.792317	0.667437972	0.077064708	19.20000076	20.05819843	0.009332394	0.015758142	0.7143628	0.001650742	0.200000003	70356.00444
59	2353368.906	629953.9783	1	186.3626745	0.000366735	6.666999817	274.3124084	0.775089631	0.080960413	9.018317414	72.75935948	0.022555534	0.482884524	0.718537092	0.001697	1.371607415	96658.20794
60	2353368.906	630203.9783	1	187.4516195	0.000314861	6.666999817	258.1089831	0.819022294	0.080520436	8.557154737	83.2712343	0.020579631	0.573864746	0.718341827	0.001697	1.342857122	94789.73204
61	2353368.906	633953.9783	1	253.5424183	0.000150569	6.666999817	1391.794246	0.609676243	0.077082236	11.82816831	25.37463388	0.009680063	0.019884659	0.71	0.001649891	0.165992779	70702.10564
62	2353618.906	620453.9783	0	203.6610424	0.013631972	3.63499999	1555.654617	0.718751192	0.089160801	55.13632379	235.369033	0.042939421	0.10799244	0.728742778	0.00153863	0.671266209	110089.693
63	2353618.906	630453.9783	1	159.5387115	6.41E-05	6.666999817	352.6873779	0.804774321	0.080837849	9.848388757	51.55102498	0	0.06612667	0.718003571	0.001697594	0.590866494	94503.92535
64	2353618.906	630703.9783	1	157.139148	6.05E-05	6.666999817	352.6873779	0.750001094	0.080348453	9.151245526	59.80369701	0.024873717	0.107117004	0.717608988	0.001697573	1.037623103	92893.27278
65	2353618.906	631203.9783	1	173.5788961	5.54E-05	6.666999817	463.3526197	0.56250304	0.079867709	7.65537714	55.59275978	0.022965686	0.149536341	0.717211962	0.001697455	1.457992871	88578.89492
66	2353618.906	633953.9783	1	235.8734182	2.85E-05	6.666999817	1408.081708	0.54380473	0.077114923	6.415391125	42.01863039	0.009943621	0.021042732	0.713829756	0.001651286	0.084491476	71197.23438
67	2353618.906	634203.9783	1	182.7118391	2.69E-05	6.666999817	1313.437192	0.632812619	0.077051409	7.056803851	56.29660163	0.009534914	0.014833953	0.713503301	0.001644039	0.090011444	NA
68	2353868.906	601953.9783	0	130.0041763	0.01431824	4.461999893	0	1.020462346	0.092160335	-0.0897007	201.1805022	0	5.607571819	0.078612395	0.001719912	78.55363865	NA
69	2353868.906	631703.9783	1	180.2124845	4.99E-05	6.666999817	527.9331392	0.688554843	0.079137824	7.983261096	43.23491593	0.023889677	0.116307021	0.716419697	0.001695981	0.400000006	NA
70	2353868.906	631953.9783	1	193.4339753	4.83E-05	6.666999817	661.5824306	0.640627146	0.079091794	7.846153736	44.24837209	0.022849212	0.104066156	0	0.001695507	0.394316705	NA
71	2353868.906	633203.9783	1	200.5481133	3.56E-05	6.666999817	1487.259695	0.719316468	0.077754092	6.101508496	46.7138704	0.013889652	0.076714311	0.714674592	0.001669872	0.418272752	75151.78052
72	2353868.906	633453.9783	1	212.5733458	3.21E-05	6.666999817	1489.124512	0.59095606	0.07744965	5.86458075	46.85513968	0	0.039431545	0.714434683	0.001663018	0.177871868	74036.16055
73	2353868.906	633703.9783	1	207.6374911	3.05E-05	6.666999817	1537.501581	0.541742025	0.077416357	5.5	46.52358448	0	0.025322348	0.713953495	0.001661933	0.164375374	72325.74219
74	2354118.906	602953.9783	0	212.7278395	0.016668067	4.461999893	0	1.012809802	0.092436285	29.35793149	187.4502934	0	5.718438843	0.079827838	0.001720509	66.53010213	82287.65292
75	2354118.906	603203.9783	0	196.444879	0.017452683	4.461999893	0	1.006962746	0.092518568	44.74709333	185.4375628	0	4.15662182	0.080044426	0.001721456	53.03938717	84383.77699
76	2354118.906	632453.9783	1	59.76837195	4.27E-05	6.666999817	1402.683572	0.625000361	0.078732423	6.978111954	41.93384495	0.019993119	0.067208672	0	0.001685719	0.033333335	NA
77	2354118.906	632703.9783	1	121.335162	4.12E-05	6.666999817	1511.056481	0.625000596	0.078685781	6.143099067	45.10591837	0.017367097	0.091494493	0.715031266	0.00168499	0.050924505	NA
78	2354118.906	637453.9783	0	163.3904557	0.002882995	7.513000011	627.5656738	0.778861421	0.078627486	28.11802091	45.90818619	0.009156134	0.526980413	0.502744198	0.001641194	3.790115694	39815.46643
79	2354368.906	613453.9783	1	238.1853604	0.006404378	6.388999939	0	1.000362279	0.091476582	117.0424737	344.2588345	0	0.913486222	0.068712533	0.00171304	19.99579018	123439.3673
80	2354368.906	614203.9783	1	190.4765665	0.007202967	5.567477945	0	1.000291136	0.092475726	98.94887777	330.0645451	0	0.792207071	0.069320142	0.001714717	17.243945	119426.1748
81	2354618.906	612203.9783	1	189.0533082	0.005204701	6.388999939	0	1.270543345	0.089909643	29.15692143	363.075903	0.005002226	18.77377477	0.068024248	0.001710338	89.17794037	131756.1907
82	2354618.906	612703.9783	1	214.9486624	0.005604004	6.388999939	0	1.174071347	0.09047659	52.58730529	359.2832859	0.005002226	13.42282327	0.068606026	0.001713858	58.55816747	128063.4336
83	2354618.906	613453.9783	1	227.2084608	0.006402611	6.388999939	0	1.0005812	0.091500023	94.26282526	344.2857699	0.002826948	1.273595518	0.06916324	0.001719053	18.99393852	124994.5715
84	2354618.906	613703.9783	1	191.5675219	0.006801915	6.388999939	0	1.000682851	0.091952309	86.23967143	342.3139706	0.002111644	1.360385539	0.069382213	0.001720439	17.51250076	123751.671
85	2354618.906	614203.9783	1	186.9328378	0.007201218	5.567477945	0	1.000558251	0.092486423	79.07281931	345.7501419	0	1.161230128	0.069411054	0.001720508	15.4760064	121080.0577
86	2354618.906	618453.9783	1	222.2012099	0.01199312	5.392000198	1595.438292	0.613692149	0.092582988	54.18031699	502.1240896	0.047581851	0.259373639	0.729534149	0.001613162	2.18452454	110879.0023
87	2354618.906	618703.9783	1	200.9173281	0.012392624	5.392000198	1671.622016	0.643611979	0.092331023	50.3447076	461.9065721	0.046691288	0.157411195	0.729290366	0.001606314	1.32898462	112014.9387
88	2354618.906	638203.9783	0	103.0635677	0.005697737	7.513000011	921.401062	0.761906564	0.079852521	28.94857969	27.21863415	0	0.823176523	0.709734082	0.001661032	2.366666555	35512.54023
89	2354868.906	592953.9783	1	215.5409282	0.002722807	3.984999895	1305.17716	0.90531912	0.090318917	36.63576167	175.3786643	0.655944417	0.403121292	0.174014002	0.001789555	1.885997136	39595.46426
90	2354868.906	611453.9783	1	177.9860057	0.005578146	6.388999939	0	1.002491171	0.088620936	98.22242811	365.6821032	0.010276596	2.604763245	0.016827976	0.001718489	45.84597595	137581.4288
91	2354868.906	611703.9783	1	180.4433731	0.005253118	6.388999939	0	1.002779696	0.089092249	97.7489321	355.2805107	0.010276596	2.729137238	0.067817286	0.001721439	47.5691663	135509.2723
92	2354868.906	612953.9783	1	195.1157399	0.006001532	6.388999939	0	1.000422219	0.091046593	80.49418816	367.3364793	0.008749487	1.035991571	0.069200628	0.001733795	17.96072517	128323.3362
93	2354868.906	613203.9783	1	197.1962859	0.006176508	6.388999939	0	1.000507987	0.091099671	74.54482427	360.851834	0.006465661	1.093945204	0.069284461	0.001734041	17.32810533	127383.0945
94	2354868.906	614203.9783	1	178.021029	0.007199961	5.567477945	0	1.000243396	0.092547119	57.84366733	366.652016	0.002562501	0.748596769	0.102585666	0.001737557	10.72338535	123010.1554
95	2354868.906	618453.9783	1	230.6651929	0.011767343	5.392000198	1644.073358	0.5078125	0.092999707	40.07953372	522.9046491	0.049725677	0	0.728957951	0.001642696	0.469270759	111690.9246
96	2354868.906	618703.9783	1	193.9129736	0.012568	5.392000198	1888.347675	0.6	0.092482381	47.98050355	406.8239775	0.048787002	0.414	0.72	0.001614965	0.771428585	112855.3189
97	2355118.906	611453.9783	1	189.4068706	0.005580036	6.388999939	0	1.001356721	0.08895131	95.51291276	340.4243506	0.046255986	1.733102322	0.016828204	0.001745675	17.76042024	138233.6993
98	2355118.906	611953.9783	1	211.3851296	0.004987888	6.388999939	0.354581848	1.00076073	0.089843757	89.95915764	346.4830752	0.046255986	1.424642596	0.093457311	0.001752254	12.04025874	135681.509
99	2355118.906	612203.9783	1	199.7206285	0.00520162	6.388999939	0	0.894838642	0.090274639	83.97811333	358.7733018	0.046255986	0.790430682	0.096536554	0.001755353	8.226427475	134823.0281
100	2355118.906	612703.9783	1	194.4199376	0.005600938	6.388999939	0	0.917916011	0.090817547	74.6058645	374.9688179	0.046255986	0.463938525	0.103353851	0.001758976	6.693338311	130963.3271
101	2355118.906	614453.9783	1	174.8174688	0.007598781	5.392000198	0	0.977119907	0.093040721	46.13798425	387.9271114	0.003188693	0.74525746	0.101383142	0.001763945	7.151577871	123715.4053
102	2355368.906	611203.9783	1	190.4399915	0.005834294	6.388999939	1.66002124	1.000910992	0.089017995	97.15028617	316.8389708	0.099824188	1.396002972	0.016785569	0.001753858	15.58125019	139988.6538
103	2355368.906	611453.9783	1	195.6979441	0.005580776	6.388999939	6.161659904	1.00110045	0.089061318	92.75	330.710578	0.099824188	1.547784421	0.016811188	0.001754197	15.36883674	139524.4571
104	2355368.906	611703.9783	1	208.7370759	0.005255741	6.388999939	37.67771303	1.001070303	0.089476185	92.18558547	342.0210421	0.099824188	1.560548548	0.105823465	0.001757439	13.19537692	138733.5273
105	2355368.906	614453.9783	1	182.2223088	0.007597041	5.392000198	0	0.94102687	0.093082634	31.88362303	446.3640216	0.007375028	0.402637609	0.101743057	0.001772868	5.827202561	125638.0625
106	2355618.906	610953.9783	1	195.2168117	0.006415494	6.342405926	6.161659904	0.911684564	0.089069766	81.7987726	271.9153938	0.156350463	1.451142592	0.016752457	0.001773328	12.85083791	141212.8017
107	2355618.906	611203.9783	1	195.8461226	0.005836929	6.342405926	39.33773427	0.924555973	0.089368557	83.04962381	281.6559217	0.156350463	1.134371146	0.016776878	0.001776378	10.53842806	140872.5197
108	2355618.906	611453.9783	1	193.3957605	0.005583406	6.342405926	125.2482978	0.930013104	0.08961092	82.09107746	291.6986688	0.156350463	0.821996656	0.016800538	0.001778748	7.327986868	140485.3921
109	2355618.906	614453.9783	1	183.2438954	0.0075953	5.378976484	0.827014256	1.000056681	0.093243155	17.49267222	536.3354682	0.013332082	0.255100177	0.103208482	0.001797007	5.132341633	127318.5724
110	2355618.906	616953.9783	1	192.4694578	0.010391079	5.392000198	1048.969051	0.590946277	0.094182787	23.23900308	1599.632676	0.060505638	0.152719904	0.729704797	0.001756988	2.152476439	118500.3249
111	2355868.906	610953.9783	1	203.7368014	0.006417398	5.482666492	124.8937159	0.682847213	0.089616625	68.26679164	250.4044469	0.209931792	0.787058774	0.016743518	0.001806912	4.930013582	141748.0512
112	2355868.906	611203.9783	1	200.0984056	0.005838823	5.482666492	176.0758896	0.729474713	0.089890091	68.00696304	265.538077	0.209931792	0.253622565	0.016767953	0.001810661	3.362145242	141538.403
113	2355868.906	614453.9783	1	188.596791	0.007594049	5.13866663	17.92351767	1.000177321	0.093531864	9.497704975	571.6940097	0.018161426	0.580712058	0.106168553	0.001834739	3.653242733	129692.0918
114	2355868.906	615953.9783	0	191.7997522	0.008967042	5.13866663	388.4138135	0.484392703	0.094322811	12.57434913	450.6622622	0.063549154	0.372791946	0.729679585	0.001817152	1.887952496	122632.0559
115	2356118.906	614453.9783	1	192.0320737	0.007593559	5.13866663	63.54630701	0.979144318	0.09362636	8.30699825	569.8676774	0.021239852	0.439801795	0.106514513	0.001846505	3.145526767	133029.3322
116	2356368.906	614703.9783	1	201.5166102	0.007991166	5.13866663	444.6327649	0.802469221	0.094161628	6.299639194	574.8851201	0.029850475	0.09010135	0.174938872	0.001876083	1.323542991	134439.5203
117	2356618.906	603203.9783	1	177.6746987	0.017425035	4.473999977	11862.28018	0.705832716	0.093354089	5.423747874	115.9370174	0.922113669	0.068889661	0.741226315	0.001804211	3.144588838	94471.3617
118	2356618.906	614703.9783	1	286.3110889	0.007989921	5.13866663	553.9421094	0.861411113	0.09460924	3.584320145	482.1834677	0.04268535	0.188466256	0.101992026	0.001923084	1.243374728	136330.2505
119	2356868.906	614703.9783	1	318.8790718	0.007989434	5.13866663	728.0534135	0.839068519	0.094750315	3.074801925	515.9690442	0.04975692	0.186693575	0.100399949	0.001937594	1.431249976	138696.4708
120	2356868.906	614953.9783	1	296.4743387	0.008164428	5.13866663	759.2564073	0.771978405	0.094777827	3.6875	574.5342211	0.055273346	0.102040025	0.174174875	0.001937496	1.350110712	137274.3795
121	2357118.906	614953.9783	1	258.6029015	0.0081627	5.13866663	924.8584411	0.644045863	0.095152512	2.550706685	518.8234706	0.057576612	0.112988324	0.653880775	0.001973987	1.725782791	139953.9515
122	2357118.906	615203.9783	1	261.5612301	0.008387338	5.13866663	1202.33238	0.769408453	0.095415112	2.538694653	321.9520114	0.063005099	0.049510664	0.618581951	0.001973597	0.576838695	137968.1666
123	2358118.906	637953.9783	1	44.57796175	0.003757353	9.987999916	660.5202909	0.708111086	0.086427998	11.89100711	37.0152231	0.026924794	0.322681494	0.466779202	0.001703065	0.410039016	38987.2882
124	2367868.906	584953.9783	1	276.949812	0.007447835	0.291999996	190.7835086	0.738187215	0.068459308	17.86677967	26.2995818	0.100126094	0.663095405	0.167581901	0.001525983	5.607166789	23344.53888
125	2370118.906	582203.9783	0	262.5322723	0.006368916	2.157999992	0	1.006387263	0.065668739	111.7668969	24.00612247	0	4.032298064	0.057899836	0.00153285	48.12714767	16186.87136
126	2370368.906	582203.9783	0	253.8258421	0.006500395	2.157999992	0	1.00460751	0.065676434	103.4354207	26.91835422	0	3.233727886	0.05756681	0.001532954	48.04744543	15871.0547
127	2370618.906	581953.9783	0	254.4763476	0.006587995	2.157999992	0	1.001297829	0.065559364	115.4262232	24.69366298	0	1.817049598	0.05733284	0.001532642	58.06134035	NA
128	2370618.906	582203.9783	0	249.1195037	0.006599133	2.157999992	0	1.003721046	0.065690059	94.88105955	19.25786033	0.000155757	2.595930197	0.057402529	0.001533097	46.43950025	NA
129	2370868.906	581953.9783	0	266.9935226	0.00661638	2.157999992	0	1.002019236	0.065559833	115.5600356	13.31552138	0.000190152	2.145436189	0.05717089	0.001532646	54.22067111	NA
130	2371368.906	581703.9783	0	241.4348824	0.006688925	2.157999992	0	1.003666759	0.065543942	102.3998201	10.93823326	0.000223061	4.23623991	0.056623261	0.001532588	77.33506251	NA
131	2371618.906	581703.9783	0	232.1330482	0.006688925	2.157999992	2.545095704	1.003066211	0.065543942	101.9375	15.91759111	0.000562747	3.844907908	0.056467481	0.001532588	71.02292528	NA
132	2371868.906	581703.9783	0	212.5652687	0.006688925	2.157999992	21.83625115	1.001332219	0.065543942	103.6882409	17.63840638	0.00110406	2.405227275	0.056313403	0.001532914	52.29436884	13076.58043
133	2374118.906	621703.9783	1	56.37903447	0.000287768	12	44.32058202	1.000016814	0.150932579	-7.073579896	2.198099497	0.005476696	0.122160811	0.076431438	0.005451524	13.43018954	NA
134	2374118.906	621953.9783	1	45.87703543	0.000288795	12	62.87470648	1.000025755	0.151003128	-7.492908553	4.885915081	0.003221723	0.119800977	0.075857848	0.005451524	13.46794053	46576.83652
135	2374118.906	622203.9783	1	169.5619374	0.000290076	12	137.2219467	1.0002649	0.151671109	-7.472893813	5.303598772	0.001707201	0.41326363	0.075723819	0.005451524	13.78960206	45082.16995
136	2374118.906	622453.9783	1	162.0910638	0.000292252	12	230.5927541	1.000939618	0.152265368	-7.036826357	4.561504843	0.001633953	1.194054162	0.07562609	0.005451524	13.80436978	42880.81547
137	2374118.906	622703.9783	1	214.3236199	0.000293169	12	376.5022789	1.001320393	0.152334813	-4.807842926	6.08386623	0.002183863	1.624518378	0.076269172	0.005451524	13.57270924	40255.32153
138	2374368.906	621703.9783	1	102.1075642	0.000228672	12	0	1.000051419	0.150776035	-7.447743002	2.658754132	0.003785504	0.225115038	0.076708585	0.005342726	13.65492965	44577.73463
139	2374368.906	622203.9783	1	232.5004762	0.000233485	12	0	1.000924777	0.151466289	-7.140786347	5.209694549	0.000761871	1.245329051	0.078190915	0.005341932	13.32852064	43851.18049
140	2374368.906	622453.9783	1	215.4227028	0.000238213	12	0	1.001210859	0.152022019	-3.71454974	4.363563706	0.000987994	1.590762968	0.079276055	0.00534129	11.03567363	41280.76923
141	2374618.906	619703.9783	1	88.8839751	0.000189013	12	7713.36196	0.709319028	0.146905214	5	1.221974916	0.021525715	0.03740095	0.706117809	0.004868178	0.118953109	56050.50271
142	2374618.906	619953.9783	1	89.56707743	0.000188945	12	7281.64539	0.890347552	0.147489941	4.979599475	2.515969588	0.02076444	0.098276823	0.70620805	0.004940958	0.279570285	55303.60508
143	2374618.906	621453.9783	1	85.77770969	0.000204264	12	172.8813502	1.000083624	0.149956911	-6.72020245	0.838130526	0.002643785	0.263429279	0.078894205	0.005114326	12.42583291	46710.14175
144	2374618.906	621703.9783	1	138.0571984	0.000209821	12	0	1.000312228	0.150467104	-7.493199825	2.173194506	0.001654897	0.514578418	0.07777112	0.005113408	13.09567068	43478.6766
145	2374618.906	621953.9783	1	197.3925427	0.000212286	12	0	1.000535691	0.150557574	-7.4375	3.061420364	0.000781886	0.793743368	0.074473038	0.005132563	13.1357078	41489.41751
146	2374618.906	622203.9783	1	230.1376401	0.000215439	12	0	1.000934087	0.151388277	-7.043089848	4.980657162	0.000318516	1.248110801	0.081139587	0.005294785	13.09173274	40794.91991
147	2374618.906	622453.9783	1	214.5728552	0.000220981	12	0	1.000918895	0.151930809	-3.003279171	5.573091478	0	1.226767481	0.080939233	0.005293866	9.84375	39516.75122
148	2374868.906	620203.9783	1	84.88411894	0.000114498	12	5829.2121	1.000012386	0.147529305	4.452053344	3.075620868	0.015008437	0.238369363	0.151971444	0.004893839	0.363909884	50636.3155
149	2374868.906	621203.9783	1	66.30161687	0.000131035	12	1040.642342	1.000281775	0.149306724	-3.093078911	1.948128085	0.001085205	0.553211964	0.078279495	0.005036835	9.834943256	44765.70039
150	2374868.906	621453.9783	1	105.069095	0.000139017	12	161.7253402	1.000152383	0.149867478	-6.245566005	1.082417039	0.000632376	0.388671883	0.078179419	0.005035808	12.21763308	43216.23004
151	2374868.906	621703.9783	1	164.694807	0.000147248	12	0	1.000882008	0.150360748	-6.573825201	2.078543861	0.000370248	1.187807584	0.077957369	0.00503489	12.84375	41628.41364
152	2374868.906	621953.9783	1	218.6311585	0.000150881	12	0	1.001374593	0.150431381	-3.627063922	3.651419961	0.000188794	1.711420259	0.076352999	0.005043069	12.54322966	40194.21134
153	2375118.906	621203.9783	1	58.41030855	9.10E-05	12	758.5858918	1.000054979	0.149066943	-4.370842641	3.789318047	0.000906204	0.288803729	0.077919409	0.004854322	10.20540624	42152.98986
154	2375118.906	621453.9783	1	169.3101667	0.000100646	12	111.3414484	1.000402832	0.149578265	-5.574222899	3.264611265	0.000313535	0.692888351	0.076252081	0.004853295	11.56073301	40721.1619
155	2375118.906	621953.9783	1	225.662839	0.000114785	12	0	1.000591874	0.15007485	2.336737943	4.448816003	0	0.972542644	0.079143517	0.004852268	10.57350992	38464.08852
156	2375368.906	620953.9783	1	58.42687774	6.26E-05	12	1159.119476	1.000066724	0.148619619	-5.476356744	2.991246849	0.004492895	0.412207025	0.125206962	0.0045934	11.2638385	41477.70508
157	2375368.906	621203.9783	1	38.41793084	8.04E-05	12	539.7501808	1.000086694	0.148665737	-4.497403151	3.456494947	0.001043381	0.33349364	0.076672465	0.004593291	11.28037681	39871.01068
158	2375368.906	621453.9783	1	237.3849652	9.05E-05	12	75.68738223	1.000483199	0.149100378	-5.452398775	4.562275568	0.000280037	0.796589647	0.076181054	0.004592264	10.99124534	38377.54227
159	2375368.906	621703.9783	1	220.904798	0.000100713	12	0	1.000585733	0.149471669	-4.137676196	4.625916595	0.000232562	0.95373432	0.081005052	0.004591346	7.353294447	37344.39782
160	2375618.906	620203.9783	1	84.6937476	2.03E-05	12	2880.422583	1.000075404	0.147127515	3.8125	7.453744235	0.017987454	0.419232389	0.70622772	0.004446256	0.319992323	42093.53414
161	2375618.906	620953.9783	1	91.59184311	4.34E-05	12	833.769831	1.000249876	0.148493886	-5.846256161	3.819833117	0.004642969	0.598590914	0.079054207	0.004514881	11.69999981	38180.33602
162	2375618.906	621203.9783	1	173.9081467	4.94E-05	12	339.0390588	1.000457137	0.148537513	-5.609964925	3.713706831	0.001078233	0.752274429	0.075626969	0.004514773	11.67427276	37931.74804
163	2375618.906	621453.9783	1	248.2787219	5.93E-05	12	45.30331065	1.000652799	0.148948315	-5.140797417	4.492778707	0.000289391	0.98732437	0.076081991	0.004513746	10.86782554	36209.30565
164	2375618.906	621703.9783	1	235.3787783	7.08E-05	12	0	1.000340095	0.149296492	-0.867221054	4.559648856	0.000241692	0.614346461	0.081510715	0.004512827	5.881249905	35338.39867
165	2375868.906	621203.9783	1	225.2229651	3.94E-05	12	229.2632729	1.000896217	0.148199029	-2.420219939	5.660410184	0.001030375	1.191569566	0.07547003	0.00433226	11.42654665	35068.63158
166	2376118.906	620703.9783	1	104.055121	2.22E-05	12	949.3071735	1.000723677	0.147390866	-1.728209416	6.650481133	0.006985519	1.076106836	0.151515812	0.00406598	7.153005134	33018.52651
167	2376118.906	620953.9783	1	147.5110647	3.41E-05	12	391.5362015	1.000475263	0.147666016	-3.108181277	8.955913793	0.003758661	0.741420525	0.079665832	0.004071338	9.37470334	32143.44367
168	2376118.906	621203.9783	1	230.7986025	3.94E-05	12	81.16010065	1.00012815	0.147694757	0.423687557	7.011038381	0.000872871	0.324925691	0.077452615	0.004071229	8.885980499	31396.32292
169	2376368.906	620453.9783	1	87.82458257	1.01E-05	12	1116.476814	1.000312546	0.146931988	2.189788798	0.383265856	0.009852781	0.724340997	0.151759073	0.003974997	2.242493384	32417.93499
170	2376368.906	620703.9783	1	97.0945736	2.21E-05	12	412.4251437	1.000619075	0.147260332	-1.551804551	3.416431693	0.005768683	1.059919061	0.15198645	0.003987779	6.758387771	31518.00362
171	2376368.906	620953.9783	1	146.8318006	3.41E-05	12	90.9174564	1.000378846	0.147514358	-2.578389148	6.674385839	0.002979714	0.668913249	0.080652572	0.003992819	8.3125	30718.67809
172	2376368.906	621203.9783	1	249.1703342	3.94E-05	12	14.0979594	1.00009439	0.147540461	0.875	6.832002593	0.000654404	0.270145804	0.075810954	0.003992711	7.838857769	29974.12653
173	2376618.906	619203.9783	1	22.17052618	0	12	2112.163086	0.678067787	0.145226985	3.994397485	1.114902772	0.021100476	0.086958959	0.70551312	0.003658568	0.100000001	35562.45705
174	2376618.906	620453.9783	1	74.47838762	1.01E-05	12	854.3225195	1.000284105	0.146677276	1.819206856	0	0.007730895	0.789702145	0.151753247	0.003795175	2.513527203	30871.02015
175	2376618.906	620703.9783	1	95.33491402	2.21E-05	12	259.007063	1.000351332	0.14695822	-2.197471883	0.294367085	0.004526344	0.97441173	0.151836976	0.003805758	7.145681	30032.39715
176	2376618.906	620953.9783	1	284.3043497	3.41E-05	12	51.39512782	1.000143133	0.147163805	-1.510647494	2.826278636	0.002266755	0.49377166	0.078340836	0.003810307	7.167561682	29305.79954
177	2376868.906	620453.9783	1	72.80655732	1.01E-05	12	722.1528111	1.000335859	0.146332028	0.615966271	0	0.004140104	0.783023642	0.151583076	0.003537995	3.535312918	29381.87086
178	2376868.906	620703.9783	1	95.75530652	2.21E-05	12	157.9525302	1.00035029	0.14655049	-4.624641873	0	0.002189151	0.861612617	0.079355828	0.003545426	9.332282092	28550.3069
179	2376868.906	620953.9783	1	335.9263478	3.41E-05	12	10.21562096	1.000170489	0.146689394	-3.162809093	1.058924759	0.001445803	0.519760781	0.077596031	0.003549277	8.370557364	27927.85027
180	2376868.906	621203.9783	1	290.8776379	3.93E-05	12	0	1.000012159	0.146701814	0.088060965	3.579185695	0.000317552	0.199609265	0.077192903	0.003549168	7.954593617	27342.38243
181	2377618.906	619203.9783	1	54.46159187	0	11.75922405	1434.930295	0.936241192	0.144445191	3.014017406	3.201576931	0.018628444	0.090674206	0.497452259	0.003047046	0.239954243	29848.9992
182	2377868.906	619703.9783	1	94.18008352	0	11.81518338	1373.145555	1.000031833	0.144812174	2.8558979	2.693925708	0.008491779	0.217421907	0.151169598	0.002817789	0.869866266	26633.14022
183	2378118.906	620703.9783	1	132.1585239	2.19E-05	8.404999733	115.2214095	1.000111693	0.145843749	-1.655180648	0	0.004084507	0.409253651	0.079574697	0.002692203	6.408017301	23427.34735
184	2378368.906	618953.9783	1	101.1394625	0	8.331000328	1312.695764	0.563070569	0.142930307	2.819940361	1.073285927	0	0.052223444	0.704971492	0.0026643	0.156765029	26553.50591
185	2378368.906	619703.9783	1	120.1040552	0	8.404999733	1308.454695	0.790672095	0.144510124	2.169458809	2.902845094	0.017114221	0.088844743	0.151013374	0.00261316	0.929094992	24761.28424
186	2378368.906	619953.9783	1	130.91637	1.75E-06	8.404999733	1156.813434	0.86157066	0.14511422	2.145194033	1.59689512	0.015928931	0.166900672	0.151128814	0.002580809	1.257803294	24110.62783
187	2378368.906	620203.9783	1	150.1521909	5.01E-06	8.404999733	833.5605763	0.899205128	0.145526652	1.647385691	0.791795616	0.013494751	0.245901579	0.15120101	0.002550436	2.142561503	23583.02109
188	2378368.906	620453.9783	1	147.5676375	1.13E-05	8.404999733	248.0548244	0.916565573	0.145556566	1.538237412	0.190813233	0.010574172	0.340711986	0.151302829	0.002547282	2.311680772	23108.9692
189	2378368.906	620703.9783	1	147.422876	2.19E-05	8.404999733	113.8174166	0.957327305	0.145822539	0.593016213	0	0.009016923	0.419012777	0.15140681	0.002518931	3.83743726	22717.9814
190	2378618.906	619453.9783	1	143.568778	0	8.405	0	0.421875477	0.143259036	2.835619522	3.117571879	0.019659708	0.064900562	0.7	0.002471203	0.294189796	24571.23866
191	2378618.906	620703.9783	1	128.3373468	2.18E-05	8.404999733	202.8773791	0.847991431	0.145784534	2.076409408	0.220239827	0.013245842	0.236095474	0.151443824	0.00228973	1.946604178	22034.58318
192	2378618.906	620953.9783	1	141.995438	3.38E-05	8.404999733	194.412058	0.855621129	0.145928144	1.272953691	0	0.009642662	0.241580413	0.151444137	0.002244131	3.027630959	21838.59287
193	2378618.906	621203.9783	1	150.3765883	3.91E-05	8.404999733	189.2602371	0.773462653	0.145928144	1.519051612	0	0.006285253	0.296227604	0.151491284	0.002244023	3.107958158	21709.58746
194	2378868.906	620703.9783	1	112.3573579	2.18E-05	8.404999733	221.9373626	0.819107358	0.145772109	2.303330487	1.660950083	0.014430306	0.228854178	0.705747962	0.002223195	1.608912809	21433.42495
195	2378868.906	620953.9783	1	128.9115807	3.38E-05	8.404999733	211.1428536	0.830932309	0.145928144	1.427458488	0.903838877	0.010530524	0.229824156	0.15145494	0.002165613	2.743750095	21285.97239
196	2378868.906	621203.9783	1	145.0665595	3.91E-05	8.404999733	210.8111223	0.729513374	0.145928144	1.857142806	0.340881695	0.006852256	0.245447496	0.151576489	0.002165505	2.806984055	21238.35484
197	2378868.906	621453.9783	1	119.9762391	4.58E-05	8.404999733	207.4022434	0.881528263	0.145928144	1.804684319	0	0.003814612	0.367869596	0.15149717	0.002164478	3.552066369	21292.26118
198	2379118.906	620703.9783	1	117.8128693	2.18E-05	8.404999733	320.4006871	0.755307706	0.145708627	2.941068375	3.851183449	0.014517628	0.195761067	0.696244657	0.002148625	0.924911086	20866.59539
199	2379118.906	620953.9783	1	131.062137	3.38E-05	8.404999733	299.2562832	0.833129504	0.145928144	2.583231875	3.496174738	0.010315758	0.17023315	0.151400954	0.002108978	2.11447088	20828.68333
200	2379118.906	621203.9783	1	154.8577348	3.90E-05	8.404999733	297.8719336	0.724849728	0.145928144	3.622595857	1.906292698	0.006698212	0.096375161	0.151546091	0.002109057	2.166026855	20875.37862
201	2379118.906	621453.9783	1	137.7633247	4.58E-05	8.404999733	228.5109359	0.879455845	0.145928144	3.719804554	0.609391495	0.003721492	0.221432409	0.151508898	0.002109778	2.720966194	20948.01917
202	2379368.906	620703.9783	1	102.518306	2.17E-05	8.404999733	572.0864734	0.780918413	0.14551056	3.736073404	2.726618968	0.01381228	0.158482467	0.696103632	0.00208235	0.54517133	20327.57406
203	2379368.906	620953.9783	1	110.0318621	3.37E-05	8.404999733	560.7044583	1.000008856	0.145928144	3.704604382	3.526314117	0.009646649	0.09472364	0.14180097	0.002066253	1.730130137	20419.05683
204	2379368.906	621203.9783	1	140.2291847	3.90E-05	8.404999733	535.1608347	1.000001073	0.145928144	5.287309486	3.64988087	0.005974754	0.047072005	0.151291877	0.00206649	1.757041723	20543.77583
205	2379618.906	620703.9783	1	92.10947501	2.17E-05	8.404999733	716.1901916	0.769363868	0.1454371	3.87687949	0.354587511	0.012389633	0.153134602	0.696034431	0.00206764	0.508398527	19861.80187
206	2379618.906	620953.9783	1	93.65298144	3.37E-05	8.404999733	704.8416927	1.000007744	0.145928144	3.891505251	1.327861734	0.008503887	0.086936928	0.141742602	0.002058354	1.681249976	20023.72772
207	2379618.906	621203.9783	1	104.8158409	3.90E-05	8.404999733	701.5216515	1.000000872	0.145928144	5.5625	2.83411622	0.005240806	0.040278961	0.14178732	0.002058625	1.699720699	20192.83877
208	2380118.906	620953.9783	1	103.4715424	0.000152488	8.404999733	1025.362361	1.000004253	0.143532329	6.168251324	2.38841352	0.007308666	0.066236429	0.141642466	0.002020745	1.567630113	19160.79758
209	2380368.906	620703.9783	0	96.68243686	0.000241118	8.404999733	1057.213257	0.784434722	0.1403113	5.3770308	2.182559806	0	0.155203176	0.695839345	0.001999974	0.431863747	18510.90926
210	2380618.906	620703.9783	0	99.86493802	0.000599332	8.404999733	1066.58216	0.729851552	0.139479649	6.483524054	2.054195277	0	0.123390795	0.695780039	0.001994341	0.400269676	18133.08686
211	2380618.906	620953.9783	0	113.7024053	0.000606477	8.404999733	1057.581877	0.987382815	0.139791176	7.980312031	3.979179227	0.005717891	0.101121465	0.141494617	0.001996675	1.258532446	18292.15262
212	2380868.906	620703.9783	0	98.24055184	0.000856819	8.404999733	1135.056014	0.656785989	0.137466432	7.818212788	1.42309666	0	0.075120673	0.695726156	0.001983556	0.329536367	17736.65253
213	2380868.906	620953.9783	0	113.4370986	0.00086118	8.404999733	1069.227011	0.972619133	0.137636352	10.13055045	2.197849261	0.005115608	0.123398425	0.141436949	0.001984482	0.935360434	17903.60399
214	2381368.906	620703.9783	1	81.57879094	0.001315851	8.404999733	1240.03697	0.893024923	0.133680428	9.369122709	0.928078782	0.005835165	0.108568481	0.141147956	0.001965885	0.40398516	16565.28504
215	2382118.906	620203.9783	1	114.0114208	0.002040814	8.404999733	1828.110888	0.880014733	0.12752676	9.137074201	0	0.005717124	0.26273412	0.695062935	0.00194924	0.316666663	14197.19893
216	2382868.906	619703.9783	1	68.93728987	0.002776604	8.404999733	2984.356947	0.719248685	0.120945307	8.5	1.819000392	0.005941152	0.151608537	0.694531083	0.001953227	0.135182341	11555.42497
217	2383118.906	619703.9783	0	53.70902537	0.003141818	8.363291675	3388.066742	1.000067751	0.118935261	9.478355209	1.780095303	0.005717124	0.375090918	0.140029654	0.001951113	0.239692075	10541.14421
218	2383868.906	619453.9783	1	47.19861741	0.003871609	8.213999748	4203.790022	0.99516207	0.112373091	10.42517838	0.363064318	0.005200202	0.367380606	0.694143832	0.001931955	1.306249976	7775.922287
219	2384118.906	616953.9783	1	48.66912254	0.00422629	9.397000313	1361.991808	0.709460516	0.10801141	3.0544014	0	0.007119926	0.070455566	0.692693114	0.001919145	0.300000012	9506.426658
220	2384118.906	618953.9783	1	31.91449757	0.004234498	9.397000313	4059.131441	0.972030166	0.109309874	10.37402622	0	0.005433196	0.344944016	0.693989933	0.001936751	0.432562428	7290.05695
221	2384368.906	616453.9783	1	25.76728063	0.004486435	9.397000313	926.3525391	0.789066672	0.106785926	3	0	0.010471534	0.11197225	0.692480922	0.001896586	0.378004388	10043.15501
222	2384368.906	617203.9783	0	332.8447208	0.004489454	9.397000313	1686.028113	0.742189288	0.106557637	4.029635847	0	0.007390798	0.087457992	0.692875266	0.001901313	0.608850855	8818.329899
223	2384368.906	618953.9783	1	51.61615571	0.004497	9.397000313	3784.634542	1.000333786	0.107505189	11.55186283	0	0.004648565	0.829968691	0.139469579	0.001922927	0.894042018	7192.853576
224	2384368.906	619203.9783	1	60.27293223	0.004497847	8.422214721	3780.776432	1.000184035	0.107689248	11.78511862	0	0.004585565	0.497688517	0.139468506	0.001911799	2.454837577	7213.708593
225	2384618.906	617203.9783	0	336.2378165	0.004592164	9.397000313	1606.335947	0.814700385	0.105922899	4.142857075	0.505759667	0.007251332	0.143560632	0.066721343	0.001893362	0.753072713	8388.129534
226	2384618.906	617453.9783	0	317.5593431	0.004593012	9.397000313	2020.843555	0.797826778	0.106056582	4.344919426	0.509609014	0.007410283	0.085414439	0.13862671	0.001901244	0.512777872	8051.346033
227	2384868.906	617453.9783	0	339.8123161	0.004958224	9.397000313	1863.693439	0.98121453	0.104619078	5.132206353	1.830444797	0.006659082	0.463738838	0.066870138	0.001885075	0.959831233	7781.472859
228	2384868.906	617703.9783	1	319.900025	0.004959733	9.397000313	2557.527552	0.985328571	0.10472449	7.205068695	1.836756015	0.005984599	0.377763707	0.138825953	0.001891827	0.635469833	7439.940413
229	2385118.906	570953.9783	0	266.4951228	0.002254595	3.009000063	0	1.000099405	0.086915312	90.46304718	10.49054688	0	0.370188546	0.047	0.001662293	54.95997274	NA
230	2385118.906	571203.9783	0	243.7721455	0.002199743	3.009000063	0	1.000459634	0.087661915	76.92043346	8.557130035	0	0.892718701	0.047	0.001664698	54.25	NA
231	2385118.906	571453.9783	0	240.1942241	0.002175311	3.009000063	0	1.000687066	0.08766739	68.42845041	5.951725456	0	1.187016614	0.047	0.001664428	53.99206964	NA
232	2385118.906	571703.9783	0	233.7387256	0.002142763	3.009000063	0	1.000872183	0.087720148	67.83131328	6.679716655	0	1.42147689	0.047	0.001661847	51.40715147	NA
233	2385368.906	570203.9783	0	263.2761405	0.002447176	3.009000063	0	1.006113217	0.085183095	94.42238604	11.04737163	0	1.593050596	0.047	0.001653587	57.38916861	NA
234	2385368.906	570453.9783	0	289.9835193	0.002414841	3.009000063	0	1.000027793	0.085966424	74.26651532	14.09124391	0	0.241350901	0.047	0.001656034	56.15238926	NA
235	2385368.906	570703.9783	0	285.5540281	0.002389288	3.009000063	0	1.000021267	0.086058818	58.89336363	12.31154609	0	0.258936555	0.047	0.001656322	56.05613157	NA
236	2385368.906	570953.9783	0	253.0387359	0.002355414	3.009000063	0	1.000404628	0.086928552	57.5586004	11.64196373	0	0.865730505	0.047	0.001659014	55.03716124	NA
237	2385368.906	616703.9783	1	95.78619505	0.005320418	9.397000313	789.1151763	0.888632732	0.100994973	3.641732762	0	0.01643926	0.400904825	0.138115987	0.001821431	1.277342286	8299.175859
238	2385618.906	569703.9783	0	197.1916676	0.002490708	3.009000063	0	1.021405101	0.084083557	64.97163421	9.63882735	0	6.958164215	0.047	0.001646723	89.7427108	NA
239	2385618.906	569953.9783	0	234.8282044	0.002506379	3.009000063	0	1.011907978	0.084406794	65.4313341	9.252069456	0	3.798441849	0.047	0.001647659	85.23126535	NA
240	2386118.906	616453.9783	1	89.18506094	0.006165021	9.397000313	1363.303518	0.853683817	0.098182289	11.94373515	1.666256091	0.023377711	0.120048935	0.692229927	0.001770051	0.345004945	7033.85259
241	2386618.906	615703.9783	1	27.31818311	0.006739036	9.397000313	2516.530297	0.971929931	0.098043098	8.978355209	0	0.025551709	0.150989736	0.691505015	0.001736187	0.285212472	6605.598016
242	2387368.906	615453.9783	1	54.26578681	0.007392174	9.397000313	3011.977261	0.995116089	0.097199289	11.72636936	0	0.022043171	0.290273521	0.691316605	0.001720493	0.935319602	5884.617641
243	2388118.906	573453.9783	0	317.173995	0.002216837	4.373000145	0	1.000122794	0.089043701	0.948503501	6.763975082	0	0.768609222	0.039468348	0.001610346	54.73041208	NA
244	2388118.906	614953.9783	1	51.33367341	0.007595303	9.397000313	3022.649121	0.95509187	0.097040454	14.66722638	1.670949505	0.022913037	0.131942323	0.691026747	0.001700458	0.618101868	5900.453932
245	2388368.906	573453.9783	0	317.7300011	0.002261332	4.373000145	0	1.000136575	0.089062794	3.591422397	4.995682971	0	0.752293625	0.039350592	0.001610372	55.86519304	NA
246	2388618.906	573203.9783	0	348.5696137	0.002435448	4.404873936	0	1.000122084	0.088865091	8.685806528	4.026157374	0	0.651941348	0.039236922	0.001612679	58.56536813	NA
247	2388618.906	573453.9783	0	346.5715087	0.002324625	4.404873936	0	1.000136074	0.089103513	8.741365282	6.440783577	0	0.754587981	0.039282892	0.00161043	58.06163635	NA
248	2388868.906	573203.9783	0	122.4660197	0.002605233	4.993000031	0	1.000169039	0.08860419	15.09419984	5.192366049	0	0.758983016	0.039170139	0.001612594	60.78382696	NA
249	2388868.906	614453.9783	1	67.32151104	0.007105241	9.359420081	3923.959922	0.91314013	0.096734309	14.18250129	1.667842261	0.021992057	0.166778195	0.690395594	0.001699218	1.008284955	5620.536571
250	2389118.906	572953.9783	0	309.6468218	0.002732193	4.993000031	0	1.000257667	0.088458933	16.75129842	4.629530815	0	0.933315069	0.039	0.001612784	61.40625	NA
251	2389118.906	573203.9783	0	13.07386051	0.002671688	4.993000031	0	1.000231732	0.088484625	16.25	6.154475126	0	0.952615645	0.039	0.001612569	61.54346104	NA
252	2389368.906	572953.9783	0	346.414254	0.002971017	4.993000031	0	1.000484621	0.088088016	20.08388883	5.463430829	0	1.493872121	0.039	0.001612711	66.58032407	NA
253	2389618.906	572953.9783	0	355.9969687	0.003142715	4.993000031	0	1.000598349	0.087557428	23.7596348	5.832260787	0	1.660230567	0.039	0.001612605	76.33574814	NA
254	2389618.906	613953.9783	1	55.58169274	0.006118344	8.817189225	5003.745925	0.887727047	0.096534044	17.20000076	0.892257239	0.023596185	0.212780619	0.135775492	0.001700741	0.693333328	5589.962225
255	2389868.906	572703.9783	0	347.5130408	0.003359395	4.861875722	0	1.000847078	0.087161435	21.09680893	6.149166805	0	1.792611313	0.039	0.001614098	81.2912327	NA
256	2389868.906	572953.9783	0	353.8648602	0.003209918	4.993000031	0	1.000747029	0.087397814	24.39311173	4.85813107	0	1.805421951	0.039	0.001612572	79.57499695	NA
257	2389868.906	613203.9783	1	15.86690884	0.004877752	9.524999619	9595.440105	0.809145461	0.096903225	12.8823028	1.11515021	0.025125023	0.379931555	0.689506292	0.00170171	0.3843933	5996.277829
258	2390118.906	572703.9783	0	109.4471925	0.003604095	4.861875722	0	1.00077823	0.086783735	30.14907862	4.725161263	0	1.65320153	0.039	0.001613918	84.8658574	NA
259	2390368.906	612953.9783	1	56.40043138	0.004384198	9.524999619	10742.51773	0.899827001	0.096632088	11.32071166	1.844576306	0.023700198	0.707567079	0.134831786	0.001703465	3.168581258	5956.469722
260	2391118.906	612703.9783	1	88.86235626	0.003043372	9.524999619	8718.05481	0.86998859	0.09643125	15.05997995	0.821023461	0.02251376	0.449194636	0.6891312	0.001705489	1.858323979	5910.545291
261	2391618.906	612203.9783	1	16.90116124	0.002177679	9.524999619	6976.05661	0.929824865	0.096369373	13.83123857	3.819233571	0.02793446	0.485717185	0.688795269	0.001706498	0.39366359	5804.696166
262	2392368.906	611703.9783	1	56.09908902	0.000884992	9.524999619	2863.718203	0.731904205	0.096429366	11.12193053	0	0.04241464	1.051780494	0.688252151	0.001708833	1.759423318	5786.604452
263	2392868.906	611953.9783	0	109.2246311	0.000806003	9.524999619	3114.900118	0.84520269	0.096481148	12.9455986	0.207708375	0.047380642	0.84576068	0.688336551	0.001713594	1.407891849	5401.33235
264	2393368.906	611953.9783	1	109.9825135	0.000661666	9.524999619	3299.400802	0.883228838	0.096499366	15.45213967	2.336469512	0.055226184	0.867979169	0.688102305	0.001715207	0.34172607	5285.476284
265	2394368.906	611703.9783	1	37.0507522	3.71E-05	6.436999798	3127.933872	0.882816851	0.099579303	20	0.104573248	0.051401023	0.132068858	0.47403276	0.001730139	0.49741145	5273.708524
266	2394368.906	611953.9783	1	73.71221592	0.000303952	6.436999798	3089.348228	0.865571697	0.099583142	20.38832858	0	0.05435011	0.618044668	0.474126607	0.0017303	1.128055429	5251.506705
267	2394618.906	611453.9783	1	36.29908861	2.01E-05	6.436999798	2938.754725	0.800163877	0.099903643	16.16099648	1.504660435	0.05691512	0.246793308	0.681798577	0.001731301	0.584615409	5270.566887
268	2394868.906	610953.9783	1	44.31046606	0	6.436999798	2921.738809	0.696332749	0.1	13.38209145	1.343972909	0.059311826	0.412298449	0.681451142	0.001737	0.395110519	5260.538188
269	2395368.906	610953.9783	1	66.37495661	0	6.436999798	1938.684099	0.707815253	0.102604538	13.80000019	1.789529277	0.059994446	0.489748962	0.681556463	0.001740794	1.970000029	5251.794374
270	2395368.906	611203.9783	1	70.67944911	0	6.436999798	2266.326056	0.830029119	0.102571653	14.09376773	1.655219081	0.054630283	0.414518315	0.68152076	0.001740648	2.10048252	5243.42861
271	2395618.906	610953.9783	1	88.91472853	0	6.436999798	1242.417704	0.741244217	0.103240376	15.88715834	1.169173756	0.057964499	0.366382891	0.681483805	0.001743001	1.707750848	5201.785662
272	2395618.906	611203.9783	1	88.97476818	0	6.436999798	1342.131481	0.700408477	0.103425932	15.95728494	1.714912067	0.053811687	0.510649691	0.681471169	0.0017436	1.918641032	5231.919219
273	2395868.906	610953.9783	1	20.25164938	0	6.436999798	1215.740969	0.898455679	0.105336889	17.03706263	1.26550285	0.050906968	0.18935205	0.681349933	0.001750872	0.957657503	5190.576693
274	2395868.906	611203.9783	1	75.90242644	0	6.436999798	1077.431228	0.674638698	0.104660258	17.24188361	1.915382475	0.045736578	0.413199798	0.126981258	0.001747853	1.746750192	5206.442716
275	2400868.906	603703.9783	0	327.8816407	0.025741389	6.995631555	13.01533794	0.876576471	0.107214837	18.68089117	0	0.039064932	0.564508929	0.677856386	0.001733365	3.26891625	4599.48545
276	2400868.906	603953.9783	0	329.3725764	0.024991984	7.012000084	13.01533794	0.945954997	0.109255009	18.61742831	0	0.039196641	0.467498717	0.123601452	0.00174093	1.729794878	4631.635025
